# Supplementary material for: Short-chain fluorocarbon-based polymeric coating with excellent nonwetting ability against chemical warfare agents
Source: Royal Society of Chemistry journal article supplement (doi:10.1039/d1ra08326k), 2022-01-01
Supplement: d1ra08326k1.pdf [file d1ra08326k1.pdf]

Electronic Supplementary Information (ESI) for RSC. Adv.

## **Short-chain fluorocarbon-based polymeric coating for excellent nonwetting ability against chemical warfare agents**

Hyunsook Jung,<sup>\*a</sup> Jihyun Kwon,<sup>a</sup> Heesoo Jung,<sup>\*a</sup> Kyeong Min Cho,<sup>a</sup> Seung Jeong Yu,<sup>a</sup> Sang Myeon Lee,<sup>a</sup> Mingy Jeon,<sup>b</sup> and Sung Gap Im<sup>b</sup>

<sup>a</sup> Chem-Bio Technology Center, Agency for Defense Development, Yuseong-gu, Daejeon 34063, Republic of Korea.

<sup>b</sup> Department of Chemical & Biomolecular Engineering, Korea Advanced Institute of Science and Technology (KAIST), 291 Daehak-ro, Yuseong-gu, Daejeon 34141, Republic of Korea.

\* Corresponding author.

E-mail: [junghs@add.re.kr](mailto:junghs@add.re.kr) (H. J.), [hsjung@add.re.kr](mailto:hsjung@add.re.kr) (H. J.)

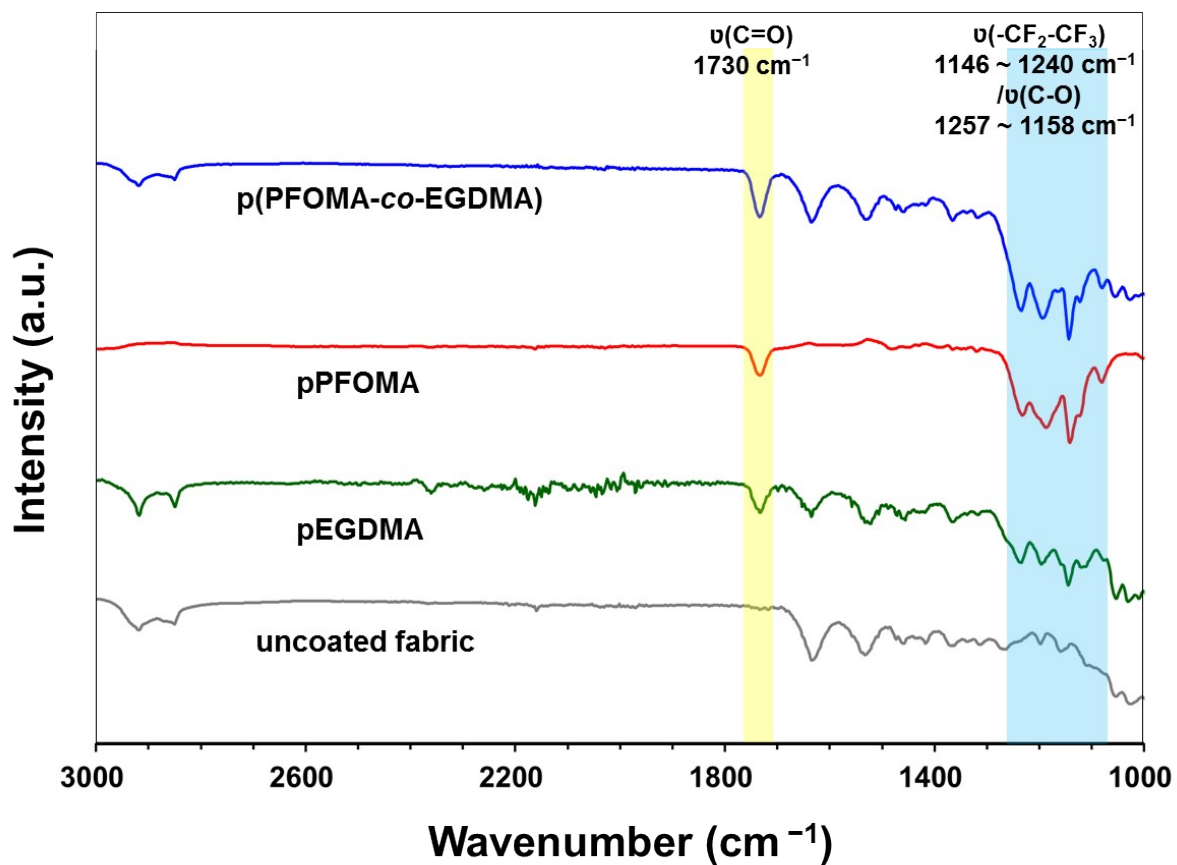

Fig. S1 FTIR spectra of polymeric coatings.

(a) p(PFOMA-co-EGDMA)

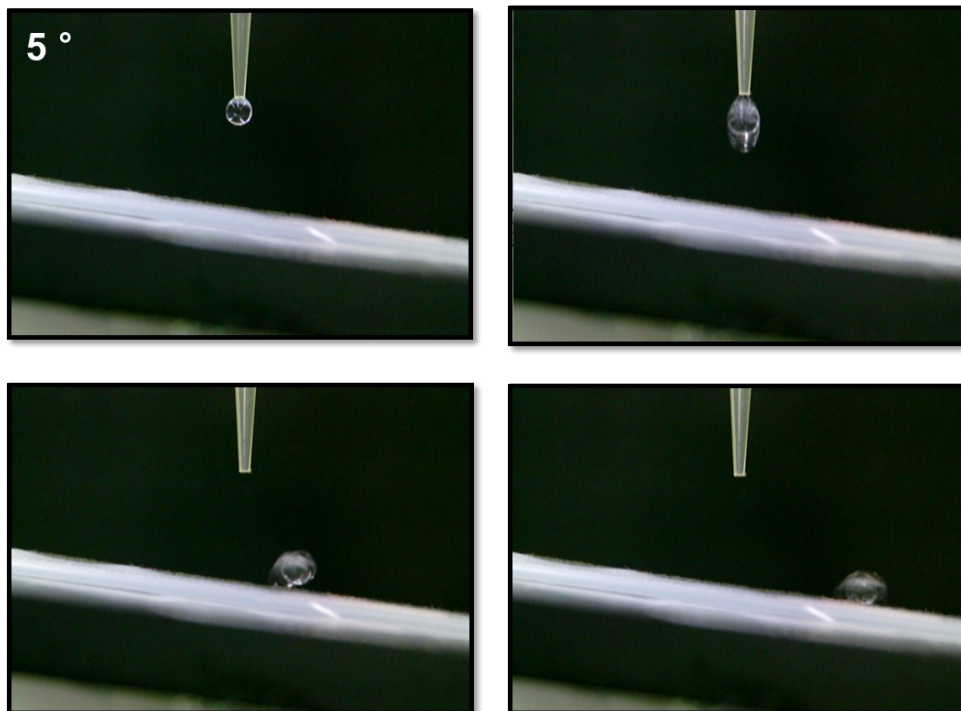

(b) pPFOMA

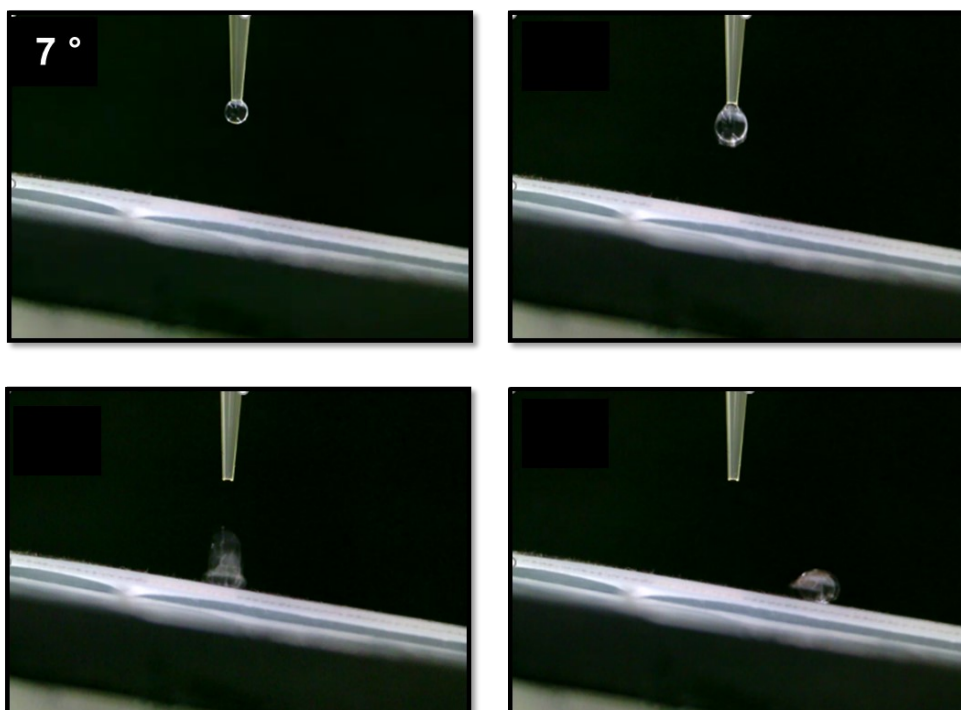

**Fig. S2** Video screenshots of water shedding angles for (a) p(PFOMA-co-EGDMA)- and (b) pPFOMA-coated surfaces.

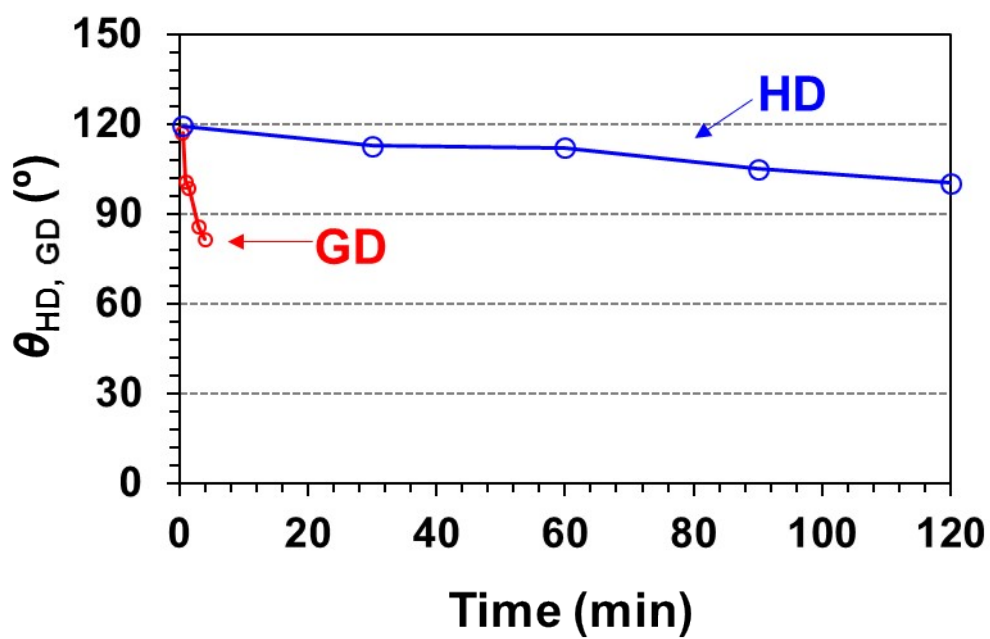

Fig. S3 Dynamic wetting curves (the static CA values) of HD and GD droplets.

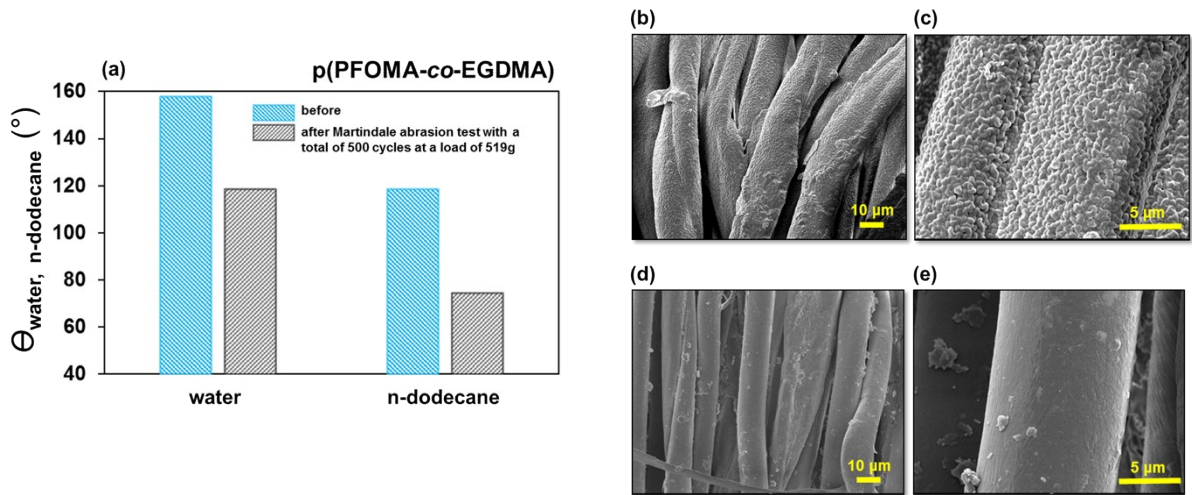

**Fig. S4** (a) Effect of Martindale abrasion cycles (a total of 500) on the water and n-dodecane repellency of the polymeric coatings. SEM images of (b and c) p(PFOMA-co-EGDMA) coating and (d and e) the same coating after 500 Martindale abrasion cycles.

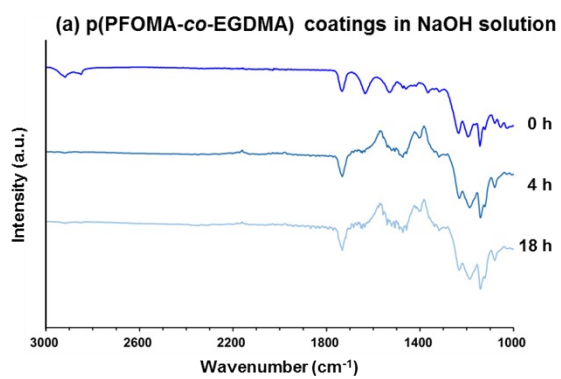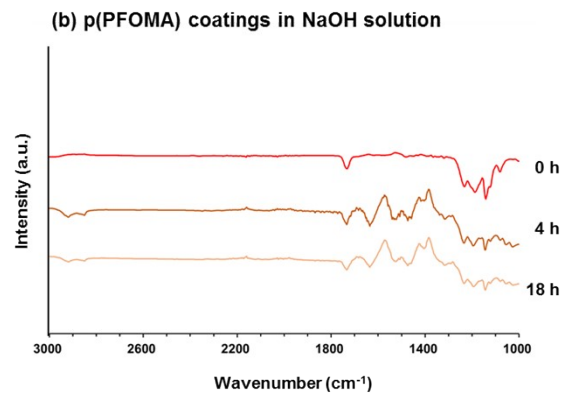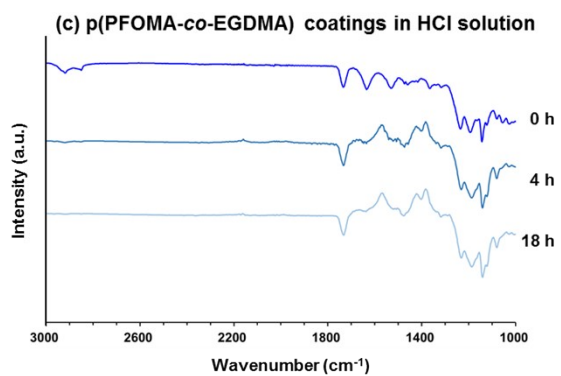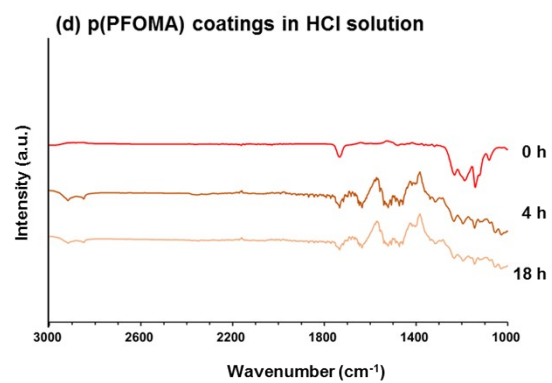

**Fig. S5** Fourier-transform infrared spectra of p(PFOMA-co-EGDMA) and p(PFOMA) coatings after being treated with 1 M NaOH and 1M HCl solutions.

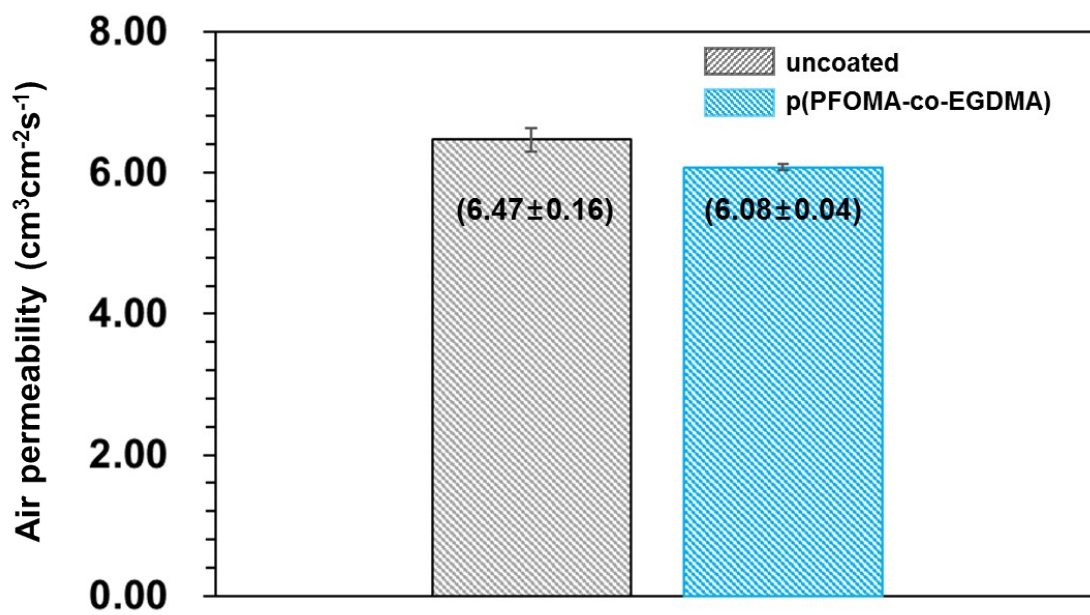

Fig. S6 Air permeability for p(PFOMA-co-EGDMA) coating and uncoated.



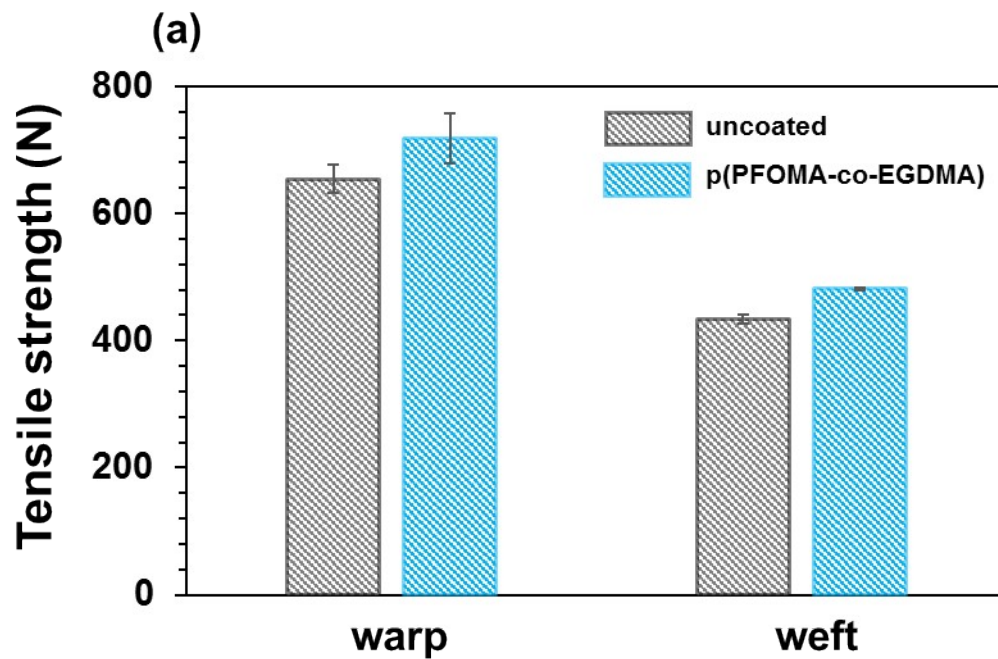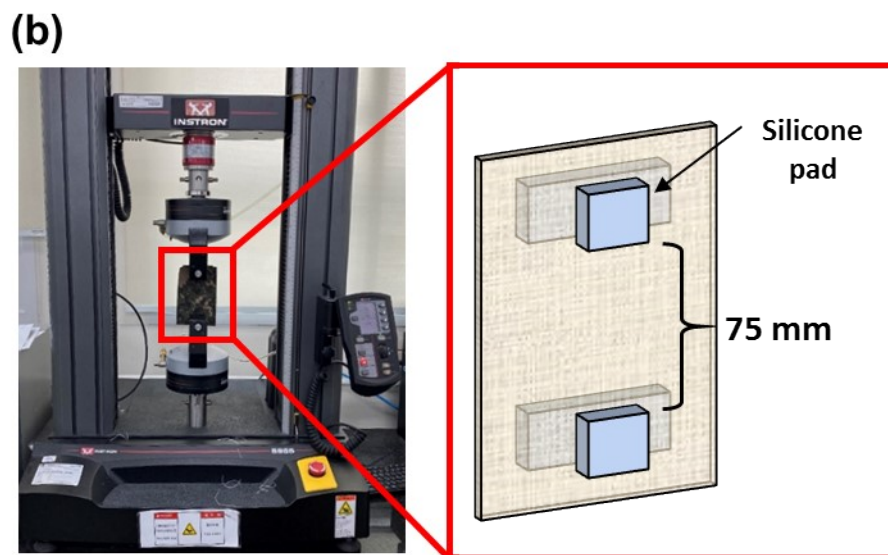

**Fig. S7** (a) The tensile strength values (warp and weft direction, respectively) of the p(PFOA-co-EGDMA) coating and uncoated fabric. (b) The configuration of the experimental setup for tensile strength characteristics using a universal testing machine (UTM, Instron-5965) in accordance with KS K0520:2015(Textiles – Tensile properties of fabrics – Determination of maximum force and elongation at maximum force using the gram method).
